# Supplementary material for: An RTM-GWAS procedure reveals the QTL alleles and candidate genes for three yield-related traits in upland cotton
Source: PubMed Central journal article supplement (PMC7487830; doi:10.1186/s12870-020-02613-y), 2020-09-07

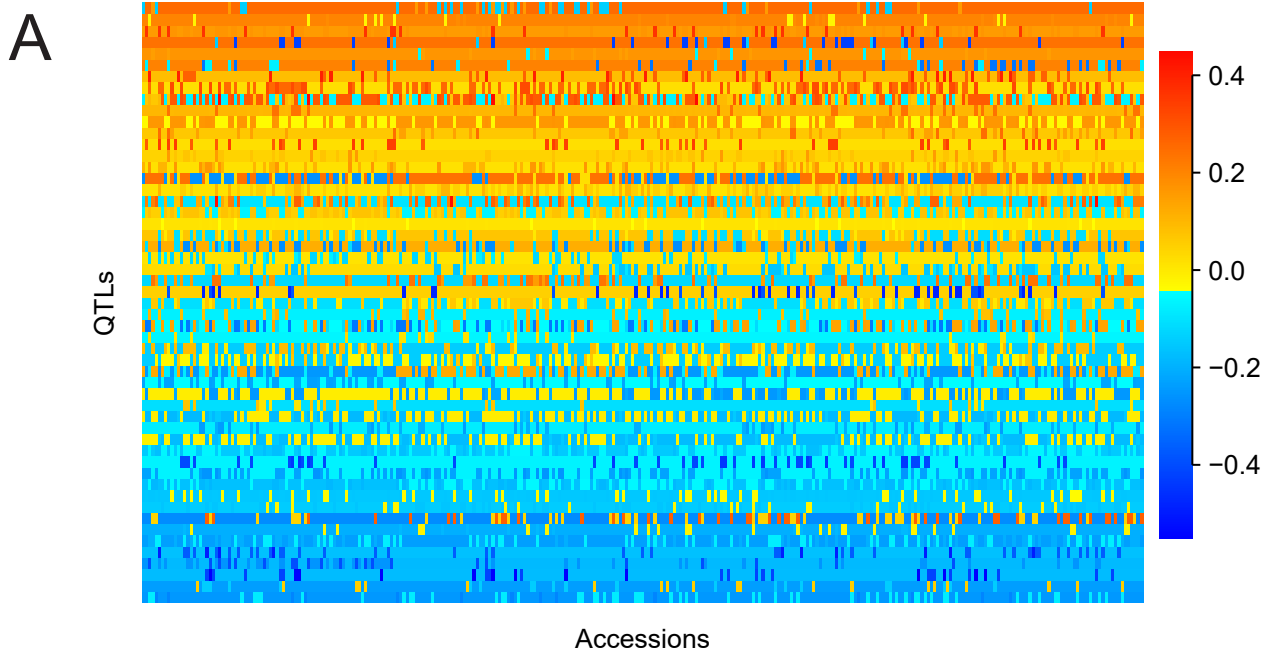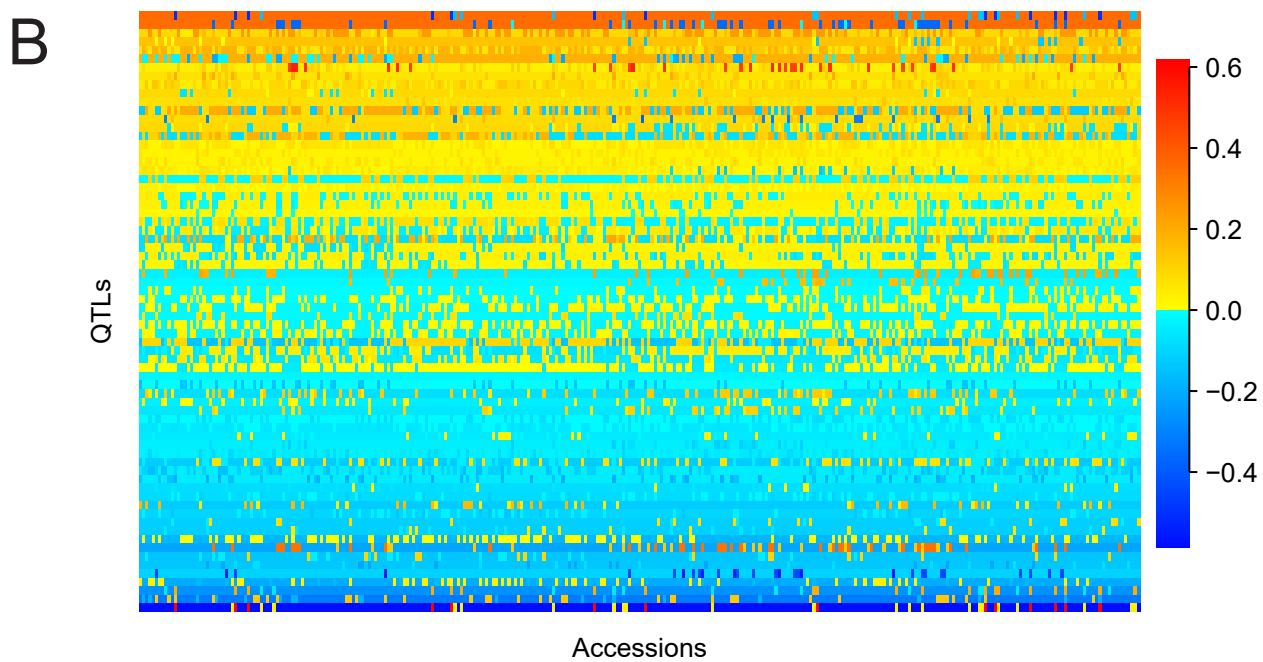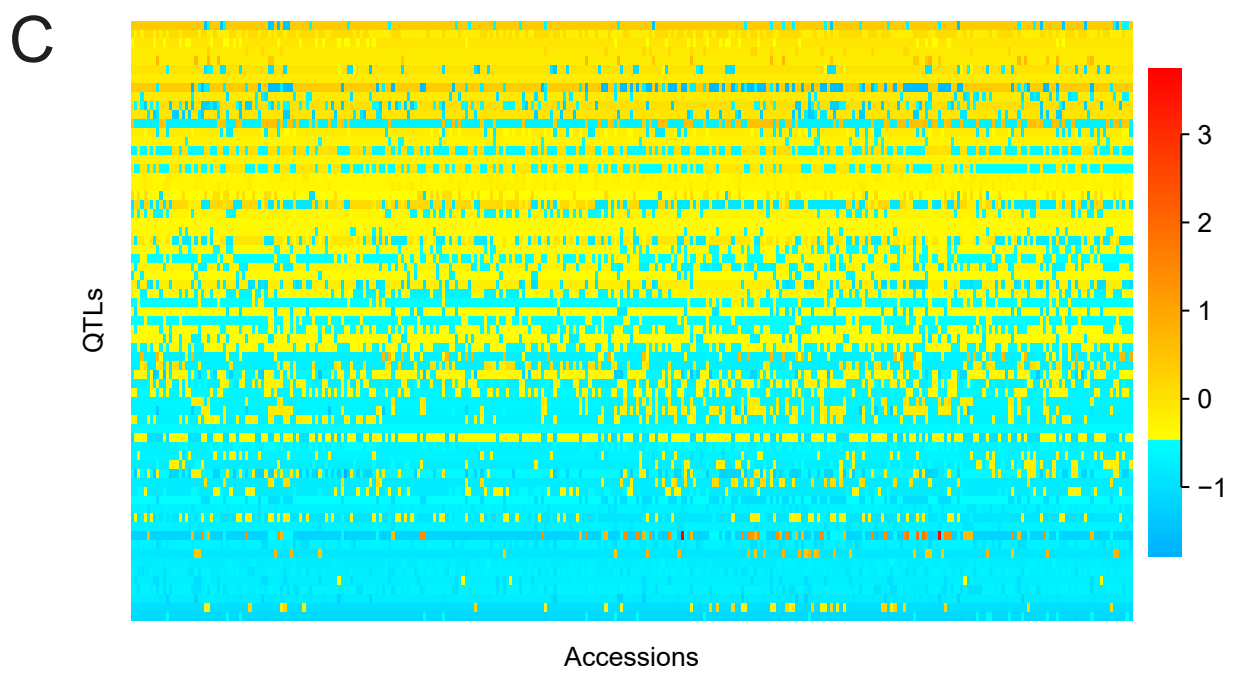

Supplement: 12870_2020_2613_MOESM1_ESM.pdf [file 12870_2020_2613_MOESM1_ESM.pdf]
